# Supplementary material for: Epidemiological characteristics and risk factors of nosocomial carbapenem-resistant Enterobacteriaceae infections in children
Source: PubMed Central journal article supplement — Chin Med J (Engl). 2020 Aug 10;133(22):2756–8. doi: 10.1097/CM9.0000000000001006 (PMC7725526; doi:10.1097/cm9.0000000000001006), 2020-08-10
Supplement: cm9-133-2756-s001.pdf [file cm9-133-2756-s001.pdf]

**Supplementary Table 1. Matching characteristics of the study patients**

| Characteristics                | CRE (n=51)   | CSE (n=102)    |
|--------------------------------|--------------|----------------|
| Age (months), median (IQR),    | 4.0 (0.1–12) | 3.0 (0.3–24.3) |
| 0–28 days                      | 19 (37.3)    | 38 (37.3)      |
| 29 days–1 year                 | 17 (33.3)    | 34 (33.3)      |
| 2–5 years                      | 7 (13.7)     | 14 (13.7)      |
| 6–16 years                     | 8 (15.7)     | 16 (15.7)      |
| Year of infection              |              |                |
| 2009                           | 2 (3.9)      | 4 (3.9)        |
| 2010                           | 1 (2.0)      | 2 (2.0)        |
| 2011                           | 4 (7.8)      | 8 (7.8)        |
| 2012                           | 3 (5.9)      | 6 (5.9)        |
| 2013                           | 7 (13.7)     | 14 (13.7)      |
| 2014                           | 3 (5.9)      | 6 (5.9)        |
| 2015                           | 6 (11.8)     | 12 (11.8)      |
| 2016                           | 7 (13.7)     | 14 (13.7)      |
| 2017                           | 13 (25.5)    | 26 (25.5)      |
| 2018                           | 5 (9.8)      | 10 (9.8)       |
| Type of infection              |              |                |
| Pneumonia                      | 21 (41.2)    | 42 (41.2)      |
| Bacteremia                     | 19 (37.3)    | 38 (37.3)      |
| Urinary tract infection        | 6 (11.8)     | 12 (11.8)      |
| Skin and soft-tissue infection | 3 (5.9)      | 6 (5.9)        |
| Intraabdominal infection       | 2 (3.9)      | 4 (3.9)        |

CRE: Carbapenem-resistant *Enterobacteriaceae*; CSE: Carbapenem-susceptible *Enterobacteriaceae*;

IQR: interquartile range.

**Supplementary Table 2. Phenotypes and genotypes of 23 carbapenem-resistant *Enterobacteriaceae* isolates**

| Isolates<br>NO. | MIC of<br>Carbapenems<br>( $\mu\text{g}/\text{mL}$ ) |     | MHT | Resistant genes     |                                        |              |
|-----------------|------------------------------------------------------|-----|-----|---------------------|----------------------------------------|--------------|
|                 | IPM                                                  | ETP |     | Carbapenemases      | ESBLs                                  | AmpCs        |
| EC1             | 16                                                   | 8   | +   | <i>KPC-2</i>        | <i>TEM-1</i>                           | <i>DHA-1</i> |
| EC2             | 8                                                    | 8   | +   | <i>KPC-2</i>        | <i>TEM-1</i>                           | <i>DHA-1</i> |
| EC3             | 8                                                    | 8   | +   | <i>KPC-2</i>        | <i>TEM-1</i>                           | <i>DHA-1</i> |
| EC4             | 16                                                   | 8   | +   | <i>KPC-2</i>        | <i>TEM-1</i>                           | <i>DHA-1</i> |
| EC5             | 16                                                   | 8   | +   | <i>KPC-2</i>        | <i>TEM-1</i>                           | <i>DHA-1</i> |
| EC6             | 16                                                   | 4   | +   | <i>KPC-2</i>        | –                                      | –            |
| EC7             | 8                                                    | 4   | +   | <i>IMP-8</i>        | <i>TEM-1, CTX-M-15</i>                 | –            |
| EC8             | 32                                                   | 16  | +   | <i>NDM-1</i>        | <i>SHV-11</i>                          | –            |
| EC9             | 32                                                   | 8   | +   | <i>NDM-1</i>        | <i>SHV-11</i>                          | –            |
| EC10            | 16                                                   | 8   | +   | <i>NDM-1</i>        | –                                      | –            |
| EC11            | 8                                                    | 4   | +   | <i>KPC-2</i>        | <i>TEM-1</i>                           | –            |
| EC12            | 8                                                    | 4   | +   | <i>KPC-2</i>        | <i>TEM-1</i>                           | –            |
| EC13            | 16                                                   | 8   | +   | <i>KPC-2</i>        | <i>TEM-1</i>                           | <i>ACT-1</i> |
| EC14            | 32                                                   | 8   | +   | <i>KPC-2</i>        | <i>TEM-3</i>                           | –            |
| EC15            | 8                                                    | 4   | +   | <i>KPC-2</i>        | <i>TEM-1, SHV-10</i>                   | –            |
| KO1             | 32                                                   | 16  | +   | <i>KPC-2</i>        | <i>TEM-1, CTX-M-1, CTX-M-9</i>         | –            |
| KO2             | 8                                                    | 4   | –   | –                   | <i>TEM-1, SHV-11, CTX-M-1</i>          | –            |
| KO3             | 8                                                    | 4   | –   | –                   | <i>TEM-1, SHV-11, CTX-M-1</i>          | –            |
| KP1             | 32                                                   | 8   | +   | <i>KPC-2</i>        | <i>TEM-1</i>                           | –            |
| KP2             | 16                                                   | 8   | +   | <i>KPC-2</i>        | <i>TEM-1, SHV-10</i>                   | –            |
| KP3             | 32                                                   | 16  | +   | <i>KPC-2</i>        | <i>TEM-1, SHV-11, CTX-M-1, CTX-M-9</i> | –            |
| ECO1            | 16                                                   | 4   | +   | <i>KPC-2</i>        | <i>TEM-1</i>                           | –            |
| SM1             | 32                                                   | 16  | +   | <i>KPC-2, VIM-1</i> | <i>TEM-1, CTX-M-1</i>                  | <i>CMY-2</i> |

MIC: minimum inhibitory concentration; IPM: imipenem; ETP: ertapenem; MHT: modified Hodge test; ESBL: extended spectrum  $\beta$ -lactamase; AmpC: AmpC cephalosporinase; +: positive; –: not detected; EC: *Enterobacter cloacae*; KO: *Klebsiella oxytoca*; KP: *Klebsiella pneumoniae*; ECO: *Escherichia coli*; SM: *Serratia marcescens*; KPC: *Klebsiella pneumoniae* carbapenemase; NDM: New Delhi metallo- $\beta$ -lactamase; VIM: Verona integron-encoded metallo- $\beta$ -lactamase.

**Supplementary Table 3. Antimicrobial susceptibility testing of carbapenem-resistant *Enterobacteriaceae* isolates**

| Agents                        | No. of isolates tested | Resistant, <i>n</i> (%) | Intermediate, <i>n</i> (%) | Susceptible, <i>n</i> (%) |
|-------------------------------|------------------------|-------------------------|----------------------------|---------------------------|
| Amikacin                      | 46                     | 2 (4.3)                 | 2 (4.3)                    | 42 (91.3)                 |
| Ampicillin                    | 50                     | 50 (100)                | 0                          | 0                         |
| Ampicillin/sulbactam          | 29                     | 29 (100)                | 0                          | 0                         |
| Aztreonam                     | 57                     | 47 (82.4)               | 5 (8.8)                    | 5 (8.8)                   |
| Cefazolin                     | 52                     | 52 (100)                | 0                          | 0                         |
| Cefepime                      | 57                     | 55 (96.5)               | 0                          | 2 (3.5)                   |
| Cefotaxime                    | 44                     | 44 (100)                | 0                          | 0                         |
| Cefoperazone/sulbactam        | 38                     | 26 (68.4)               | 6 (15.8)                   | 6 (15.8)                  |
| Ceftazidime                   | 56                     | 53 (94.6)               | 0                          | 3 (5.4)                   |
| Ceftriaxone                   | 57                     | 55 (96.5)               | 0                          | 2 (3.5)                   |
| Cefuroxime                    | 43                     | 43 (100)                | 0                          | 0                         |
| Ciprofloxacin                 | 57                     | 15 (26.3)               | 4 (7.0)                    | 38 (66.7)                 |
| Ertapenem                     | 11                     | 11 (100)                | 0                          | 0                         |
| Gentamicin                    | 57                     | 28 (49.1)               | 1 (1.8)                    | 28 (49.1)                 |
| Imipenem                      | 57                     | 54 (94.7)               | 3 (5.3)                    | 0                         |
| Levofloxacin                  | 57                     | 12 (21.1)               | 2 (3.5)                    | 43 (75.4)                 |
| Macrodantin                   | 13                     | 5 (38.5)                | 4 (30.8)                   | 4 (30.8)                  |
| Meropenem                     | 29                     | 29 (100)                | 0                          | 0                         |
| Piperacillin                  | 33                     | 33 (100)                | 0                          | 0                         |
| Piperacillin/tazobactam       | 57                     | 46 (80.7)               | 8 (14.0)                   | 3 (5.3)                   |
| Tigecycline                   | 28                     | 0                       | 0                          | 28 (100)                  |
| Trimethoprim/sulfamethoxazole | 57                     | 31 (54.4)               | 0                          | 26 (45.6)                 |
| Tobramycin                    | 56                     | 13 (23.2)               | 11 (19.6)                  | 32 (57.1)                 |

**Supplementary Table 4: Outcomes of patients according to treatment regimens**

| Variables                         | CRE           |                    |           | CSE           |                    |           |
|-----------------------------------|---------------|--------------------|-----------|---------------|--------------------|-----------|
|                                   | Died<br>(n=7) | Survived<br>(n=44) | Mortality | Died<br>(n=6) | Survived<br>(n=96) | Mortality |
| Regimens                          |               |                    |           |               |                    |           |
| Monotherapy                       | 5             | 24                 | 17.2      | 6             | 91                 | 6.2       |
| Combination therapy               | 2             | 20                 | 9.1       | 0             | 5                  | 0         |
| Antimicrobial included in therapy |               |                    |           |               |                    |           |
| β-lactam/β-lactamase inhibitors   | 4             | 19                 | 17.4      | 2             | 33                 | 5.7       |
| Fluoroquinolone                   | 1             | 13                 | 7.1       | 0             | 2                  | 0         |
| Third-generation cephalosporins   | 0             | 5                  | 0         | 0             | 25                 | 0         |
| Carbapenems                       | 3             | 9                  | 25.0      | 4             | 41                 | 8.9       |
| Aminoglycoside                    | 0             | 4                  | 0         | NA            | NA                 | NA        |
| Fosfomycin                        | 0             | 8                  | 0         | NA            | NA                 | NA        |
| Tigecycline                       | 1             | 3                  | 25.0      | NA            | NA                 | NA        |

CRE: Carbapenem-resistant Enterobacteriaceae; CSE: Carbapenem-susceptible Enterobacteriaceae;  
NA: Not applicable.
